# Supplementary material
Source: publisher figshare collection journal article supplement (https://gsapubs.figshare.com/ndownloader/files/22745339)

# Easter Island, SE Pacific: An end-member type of hot spot volcanism

Luigina Vezzoli, Valerio Acocella

## SUPPLEMENTARY MATERIAL FOR DATA REPOSITORY

### Table DR1 - Summary of the published radiometric ages of Easter Island rocks

In Table DR1 we have summarized all the published radiometric ages on Easter Island. Topographic and stratigraphic location of each sample is described. All analyses were done on whole rock samples, if not specified in the sample description. The age data are reported as in the original references and with the uncertainties at the one sigma confidence interval.

All the available ages on Easter Island are consistent with a very recent evolution ( $<0.94$  Ma), with three exceptions, which report ages older than 1.89 Ma (Table DR1). These are:

- 1) a lava on the northern cliff of Poike (age of 3 Ma; Baker et al., 1974);
- 2) a transitional basalt on the N coast of Poike (EC307 in Table DR1; age of  $2.54 \pm 0.28$  Ma; Clark and Dymond, 1977);
- 3) a hawaiite on the S coast of Terevaka (EC383 in Table DR1; age of  $1.89 \pm 0.11$  Ma; Clark and Dymond, 1977).

However, each of these 3 ages is inconsistent with several data.

Samples 1) and 2) are both taken from the base of the N cliff of Poike. However, other samples in the same position or immediately above (as 177732, EA29, EA28, EH311 in Table DR1; Clark and Dymond, 1977; Clark, 1975; Kaneoka and Katsui, 1985) give 6 ages, all consistent with the interval 0.89-0.52 Ma. Since there are no major unconformities within the lava pile outcropping along the cliffs of Poike, no significant gaps in the evolution of this volcano should be expected.

Sample 3) has been taken on the S coast of Terevaka, at Point One Tea headland. Clark and Dymond (1977) attributed this sample at the Poike shield volcano, but at the locality indicated only the very fresh, hawaiitic lava flow coming from the Maunga Te Oirena cinder cone is exposed on the marine cliff, and no older lavas or significant unconformities have been observed at its base. The Maunga Te Oirena cinder cone and related lava flow belong to a recent, ESE-trending eruptive fissure developed on the southern slopes of Terevaka volcano. However, sample EC396, also taken from Maunga Te Oirena lava flow, gives a different age (0.21 Ma; Clark, 1975), largely consistent with its stratigraphic position and its location on this portion of the Terevaka volcano.

In addition, paleomagnetic measurements (Isaacson and Heinrichs, 1976; Miki et al., 1998; Brown, 2002) indicate that all analyzed lavas of Easter Island had normal polarity and probably represent the Brunhes normal polarity epoch, beginning at ca. 0.78 Ma in the standard geomagnetic polarity time-scale (Singer and Pringle, 1996; Tauxe et al., 1996). Moreover, geochemical models (Haase et al., 1997) indicate a consistent evolution of the magmas of the island, without gaps.

Based on these evidences, we suggest that these three samples are misfits within the spectrum of determined ages, with the magnetostratigraphy, and with the stratigraphic constraints from geologic mapping and therefore cannot be considered reliable to assess the evolution of Easter Island.

Moreover, two radiometric ages are older than the 0.78 Ma of the Brunhes normal polarity epoch. These are:

- 1) a tholeiitic basalt at the base of the northern coast of Poike (177732, age of  $0.89 \pm 0.19$  Ma; Clark and Dymond, 1977)
- 2) a tholeiitic basalt at the base of the western coast of Rano Kau (EH 29, age of  $0.94 \pm 0.19$  Ma; Clark, 1975).

Considering the associated measurement error, these samples may also fall within the Brunhes epoch, confirming that the subaerial Eastern Island volcanism spans the last ca. 0.78 Ma.

Finally, Terevaka shield-building and caldera-forming periods are poorly dated, with only two ages of  $<0.77$  Ma (Miki et al., 1998) and 0.3 Ma (Baker et al., 1974) respectively. Our assumption that Terevaka shield stage developed during the same time interval of the other two volcanoes is in particular suggested by the maximum age of 0.78 Ma constrained by the normal polarity of several Terevaka shield lavas (Brown, 2002) and the minimum age of 0.24 Ma defined by the dated fissure activity of the rifting stage shown in Figure 4 and Table DR1.

## Figure DR1

Geological map of Easter Island (Chile). Base map and toponyms of the volcanic units of the rifting stage of Terevaka volcano are taken from the 1:25,000 topographic map of the Easter Island of the Instituto Geografico Militar de Chile (2004).

## Figure DR2

The Fry plot method is commonly used to define strain orientation in rocks with rigid objects, even though it is also often used to study the spatial distribution of specific features, such as volcanic vents (e.g. Ramsay and Huber, 1983). The method relies on a plot of the position of each particle centre with respect to a particle at the origin. The origin is then sequentially placed on each centre and the relative position of every other centre is plotted. In order to have more detailed results, the method is applied at two distinct areas lying on the S and E slope of Terevaka (Fig. DR1).

**Caption of Figure DR2** - Fry plots with the: a) preferred NNE-SSW distribution of the cones on the south slope of Terevaka (focused rift zone); and b) scattered and less defined WNW-ESE distribution of the cones along the east slope of Terevaka (diffuse rift zone).

## References

- Baker, P.E., Buckley, F., and Holland, J.G., 1974, Petrology and geochemistry of Easter Island: Contributions to Mineralogy and Petrology, v. 44, p. 85-100.
- Brown, L., 2002, Paleosecular variation from Easter Island revisited: modern demagnetization of a 1970s data set: Physics of the Earth and Planetary Interiors, v. 133, p. 73-81.
- Clark, J.G., 1975, Age, chemistry and tectonic significance of Easter and Sala y Gomez Islands [M.S. Thesis]: Corvallis, Oregon State University, 135 p.
- Clark, J.G., and Dymond, J., 1977, Geochronology and petrochemistry of Easter and Sala y Gomez Islands: Implications for the origin of the Sala y Gomez Ridge: Journal of Volcanology and Geothermal Research, v. 2, p. 29-48.
- Kaneoka, I., and Katsui, Y., 1985, K-Ar ages of volcanic rocks from Easter Island: Bulletin of the Volcanological Society of Japan, v. 30, p. 33-36.
- Isaacson, L.B., and Heinrichs, D.F., 1976, Paleomagnetism and secular variation of the Easter Island basalts: Journal of Geophysical Research, v. 81, p. 1476-1482.
- Miki, M., Inokuchi, H., Yamaguchi, S., Matsuda, J., Nagao, K., Isezaki, N., and Yaskawa, K., 1998, Geomagnetic paleosecular variation in Easter Island, the Southeast Pacific: Physics of the Earth and Planetary Interiors, v. 106, p. 93-101.
- Ramsay, J.G., and Huber, M.I., 1983, Modern structural geology: Strain Analysis: London, Academic Press, p. 308.
- Singer, B.S., and Pringle, M.S., 1996, Age and duration of the Matuyama-Brunhes geomagnetic polarity reversal from  $^{40}\text{Ar}/^{39}\text{Ar}$  incremental heating analyses of lavas: Earth and Planetary Science Letters, v. 139, p. 47-61.
- Tauxe, L., Herbert, T., Shackleton, N.J., and Kok, Y.S., 1996, Astronomical calibration of the Matuyama-Brunhes boundary: Consequences for magnetic acquisition in marine carbonate and the Asian loess sequences: Earth and Planetary Science Letters, v. 140, p. 133-146.

TABLE DR1 – SUMMARY OF THE PUBLISHED RADIOMETRIC AGES OF EASTER ISLAND ROCKS

| Sample number; location (note)                                                                                                  | Rock type (1)       | Unit (2) | Method | Age $\pm 1\sigma$ Ma               | Reference                     |
|---------------------------------------------------------------------------------------------------------------------------------|---------------------|----------|--------|------------------------------------|-------------------------------|
| <b><u>POIKE</u></b>                                                                                                             |                     |          |        |                                    |                               |
| “Lava from the foot of the high cliffs on the north side of Poike”<br>(without analytical data)                                 | -                   | P1       | K/Ar   | 3                                  | Baker et al. (1974)           |
| EC307; at the base of the N coast of Poike (on feldspar)                                                                        | Transitional basalt | P1       | K/Ar   | 2.54 $\pm$ 0.28                    | Clark and Dymond (1977)       |
| 177732; at the base of the N coast of Poike, 500m E and above<br>sample EC307                                                   | Tholeiitic basalt   | P1       | K/Ar   | 0.89 $\pm$ 0.19                    | Clark and Dymond (1977)       |
| EH39; at the base of the S coast of Poike                                                                                       | Tholeiitic basalt   | P1       | K/Ar   | 0.75 $\pm$ 0.15                    | Clark and Dymond (1977)       |
| EA29; at the base of the N coast of Poike (the same site of Baker et<br>al., 1974; and sample 177732 of Clark and Dymond, 1977) | Transitional basalt | P1       | K/Ar   | 0.67 $\pm$ 0.26<br>0.69 $\pm$ 0.15 | Kaneoka and Katsui (1985)     |
| EA28; at the base of the N coast of Poike (the same site of sample<br>EC307 in Clark and Dymond, 1977)                          | Transitional basalt | P1       | K/Ar   | 0.52 $\pm$ 0.29<br>0.62 $\pm$ 0.32 | Kaneoka and Katsui (1985)     |
| EH42; S coast of Poike, 100m E and above sample EH39                                                                            | Transitional basalt | P1       | K/Ar   | 0.59 $\pm$ 0.12                    | Clark (1975)                  |
| EH311; N coast of Poike, above sample 17732                                                                                     | Transitional basalt | P1       | K/Ar   | 0.54 $\pm$ 0.11                    | Clark (1975)                  |
| EC319; N coast of Poike                                                                                                         | Transitional basalt | P1       | K/Ar   | 0.41 $\pm$ 0.05                    | Clark (1975)                  |
| OG829; N coast of Poike                                                                                                         | Alkalic basalt      | P1       | K/Ar   | <0.30                              | Gonzalez-Ferran et al. (1974) |
| E37; S coast of Poike                                                                                                           | -                   | P1       | K/Ar   | <0.34                              | Miki et al. (1998)            |
| E10; E coast of Poike                                                                                                           | -                   | P1       | K/Ar   | <0.20                              | Miki et al. (1998)            |
| EH361; N coast of Poike, top of sea cliff W of Maunga Parehe (on<br>feldspar)                                                   | Alkalic basalt      | P2       | K/Ar   | 0.36 $\pm$ 0.21                    | Clark (1975)                  |
| E16; N coast of Poike                                                                                                           | -                   | P3       | K/Ar   | 0.14 $\pm$ 0.10                    | Miki et al. (1998)            |
| <b><u>RANO KAU</u></b>                                                                                                          |                     |          |        |                                    |                               |
| EH29; at the base of W coast of Rano Kau (on feldspar)                                                                          | Tholeiitic basalt   | R1       | K/Ar   | 0.94 $\pm$ 0.19                    | Clark (1975)                  |
| EH27; W coast of Rano Kau, above sample EH29                                                                                    | Transitional basalt | R1       | K/Ar   | 0.68 $\pm$ 0.14                    | Clark (1975)                  |
| E13; NE slope of Rano Kau, ~150 m asl                                                                                           | -                   | R1       | K/Ar   | 0.68 $\pm$ 0.07                    | Miki et al. (1998)            |
| EH20; NW coast of Rano Kau, Hanga Mataveri                                                                                      | Alkalic basalt      | R1       | K/Ar   | 0.67 $\pm$ 0.06                    | Clark (1975)                  |
| EH57; SSW inner wall of the Rano Kau caldera                                                                                    | Transitional basalt | R1       | K/Ar   | 0.48 $\pm$ 0.06                    | Clark (1975)                  |
| E12; NE slope of Rano Kau, ~200 m asl                                                                                           | -                   | R1       | K/Ar   | 0.46 $\pm$ 0.05                    | Miki et al. (1998)            |
| E27; W rim of the Rano Kau caldera                                                                                              | -                   | R2       | K/Ar   | 0.35 $\pm$ 0.04                    | Miki et al. (1998)            |
| E1; W rim of the Rano Kau caldera                                                                                               | -                   | R2       | K/Ar   | 0.34 $\pm$ 0.03                    | Miki et al. (1998)            |
| E35; SE slope of Maunga Orito                                                                                                   | Rhyolite            | R3       | K/Ar   | 0.33 $\pm$ 0.04                    | Miki et al. (1998)            |

|                                                                      |          |    |      |           |                               |
|----------------------------------------------------------------------|----------|----|------|-----------|-------------------------------|
| OG806; S slope of Maunga Orito; vitrophyre                           | Rhyolite | R3 | K/Ar | 0.34±0.06 | Gonzalez-Ferran et al. (1974) |
| EH10; summit of Maunga Orito                                         | Rhyolite | R3 | K/Ar | 0.33±0.06 | Clark (1975)                  |
| EA-O; Maunga Orito, obsidian                                         | Rhyolite | R3 | K/Ar | 0.24±0.03 | Kaneoka and Katsui (1985)     |
|                                                                      |          |    |      | 0.24±0.04 |                               |
| OG818; Maunga Te Manavai vent; vitrophyre in phreatomagmatic breccia | Rhyolite | R3 | K/Ar | 0.18±0.03 | Gonzalez-Ferran et al. (1974) |
| E36; NW slope of Maunga Orito                                        | -        | R3 | K/Ar | 0.11±0.04 | Miki et al. (1998)            |

## TEREVAKA

|                                                                    |                     |       |      |            |                               |
|--------------------------------------------------------------------|---------------------|-------|------|------------|-------------------------------|
| E22; NE coast                                                      | -                   | T1?   | K/Ar | <0.77      | Miki et al. (1998)            |
| "Lava from the NW side of M.Terevaka" (without analytical data)    | -                   | T2?   | K/Ar | 0.3        | Baker et al. (1974)           |
| OG931; NNW upper flank                                             | Benmoreite          | T2?   | K/Ar | 0.19±0.12  | Gonzalez-Ferran et al. (1974) |
| E30; W coast at Hanga Mataveri Otai, Mataveri lava flow            | -                   | T3-1  | K/Ar | <0.17      | Miki et al. (1998)            |
| OG847; Vaihu lava flow                                             | Mugearite           | T3-2a | K/Ar | 0.24±0.08  | Gonzalez-Ferran et al. (1974) |
| OG850; lower Koe Koe lava flow                                     | Hawaiite            | T3-2b | K/Ar | <0.24      | Gonzalez-Ferran et al. (1974) |
| EC370; Runga A Vae lava flow                                       | Transitional basalt | T3-3  | K/Ar | 0.24±0.05  | Clark (1975)                  |
| OG807; lava flow from the Tararaina eruptive fissure               | Mugearite           | T3-4a | K/Ar | <0.30      | Gonzalez-Ferran et al. (1974) |
| EC125; lava flow from Maunga Vai O'Hao                             | Alkalic basalt      | T3-4b | K/Ar | 0.22±0.04  | Clark (1975)                  |
| OG892; Maunga O'Tuu cinder cone                                    | Hawaiite            | T3-5b | K/Ar | 0.22±0.20  | Gonzalez-Ferran et al. (1974) |
| EC288; Maunga Pui cinder cone                                      | Mugearite           | T3-6  | K/Ar | 0.21±0.04  | Clark (1975)                  |
| EH296; xenolith on the Maunga Anamarama cinder cone                | Alkalic basalt      | T3-7  | K/Ar | 1.92±0.11  | Clark (1975)                  |
| EC396; lava flow from Maunga Te Oirena                             | Hawaiite            | T3-8  | K/Ar | 0.21±0.04  | Clark (1975)                  |
| EC383; S coast at Point One Tea, lava from Maunga Te Oirena        | Hawaiite            | T3-8  | K/Ar | 1.89±0.11  | Clark and Dymond (1977)       |
| EC323; lava flow from Maunga Kororau                               | Transitional basalt | T3-11 | K/Ar | 0.19±0.04  | Clark (1975)                  |
| E20; NE coast, lava from the Ouko Ouhi Puhi cinder cone            | -                   | T3-14 | K/Ar | <0.15      | Miki et al. (1998)            |
| OG859; Maunga Puhi-Puhi cinder cone                                | Mugearite           | T3-14 | K/Ar | <0.36      | Gonzalez-Ferran et al. (1974) |
| EC384; Tongariki lava flow                                         | Alkalic basalt      | T3-15 | K/Ar | 0.18±0.04  | Clark (1975)                  |
| E43, S coast near Rua Tuvi, lava from the Koe Koe eruptive fissure | -                   | T3-16 | K/Ar | <0.12      | Miki et al. (1998)            |
| EC177; upper Koe Koe lava flow                                     | Mugearite           | T3-16 | K/Ar | 0.17±0.03  | Clark (1975)                  |
| EC190; lava flow from Maunga Kahurea                               | Mugearite           | T3-17 | K/Ar | 0.16±0.03  | Clark (1975)                  |
| EH88; lava flow from the Maunga Omoanga fissure, S sector          | Transitional basalt | T3-18 | K/Ar | 0.14±0.15  | Clark (1975)                  |
| EC413; lava flow from the Maunga Omoanga fissure, N sector         | Mugearite           | T3-20 | K/Ar | 0.10±0.02  | Clark (1975)                  |
| EC166; lava flow from Maunga Retu                                  | Hawaite             | T3-21 | K/Ar | 0.11±0.04  | Clark (1975)                  |
| EC153; lava flow from Maunga Retu                                  | Hawaite             | T3-21 | K/Ar | 0.09±0.02  | Clark (1975)                  |
| EC224; lava flow from Maunga Vaka Kipu                             | Alkalic basalt      | T3-23 | K/Ar | 0.004±0.05 | Clark (1975)                  |

|                                                              |                |       |                                 |                 |                        |
|--------------------------------------------------------------|----------------|-------|---------------------------------|-----------------|------------------------|
| EI9209; Roiho lava flow at Maunga Hiva Hiva (on plagioclase) | Alkalic basalt | T3-24 | $^{40}\text{Ar}/^{39}\text{Ar}$ | $0.13 \pm 0.02$ | O'Connor et al. (1995) |
| EC206; Roiho lava flow                                       | Alkalic basalt | T3-24 | K/Ar                            | $0.11 \pm 0.02$ | Clark (1975)           |
| EC201; Roiho lava flow                                       | Alkalic basalt | T3-24 | K/Ar                            | $0 \pm 0.05$    | Clark (1975)           |

---

(1) According to the TAS diagram of the Figure 3.

(2) Stratigraphic units name as shown in Figure 5. For the eruptive centres of the fissural activity of the Terevaka volcano (unit T3), number refers to the stratigraphic order exposed in the Figure 10.

---

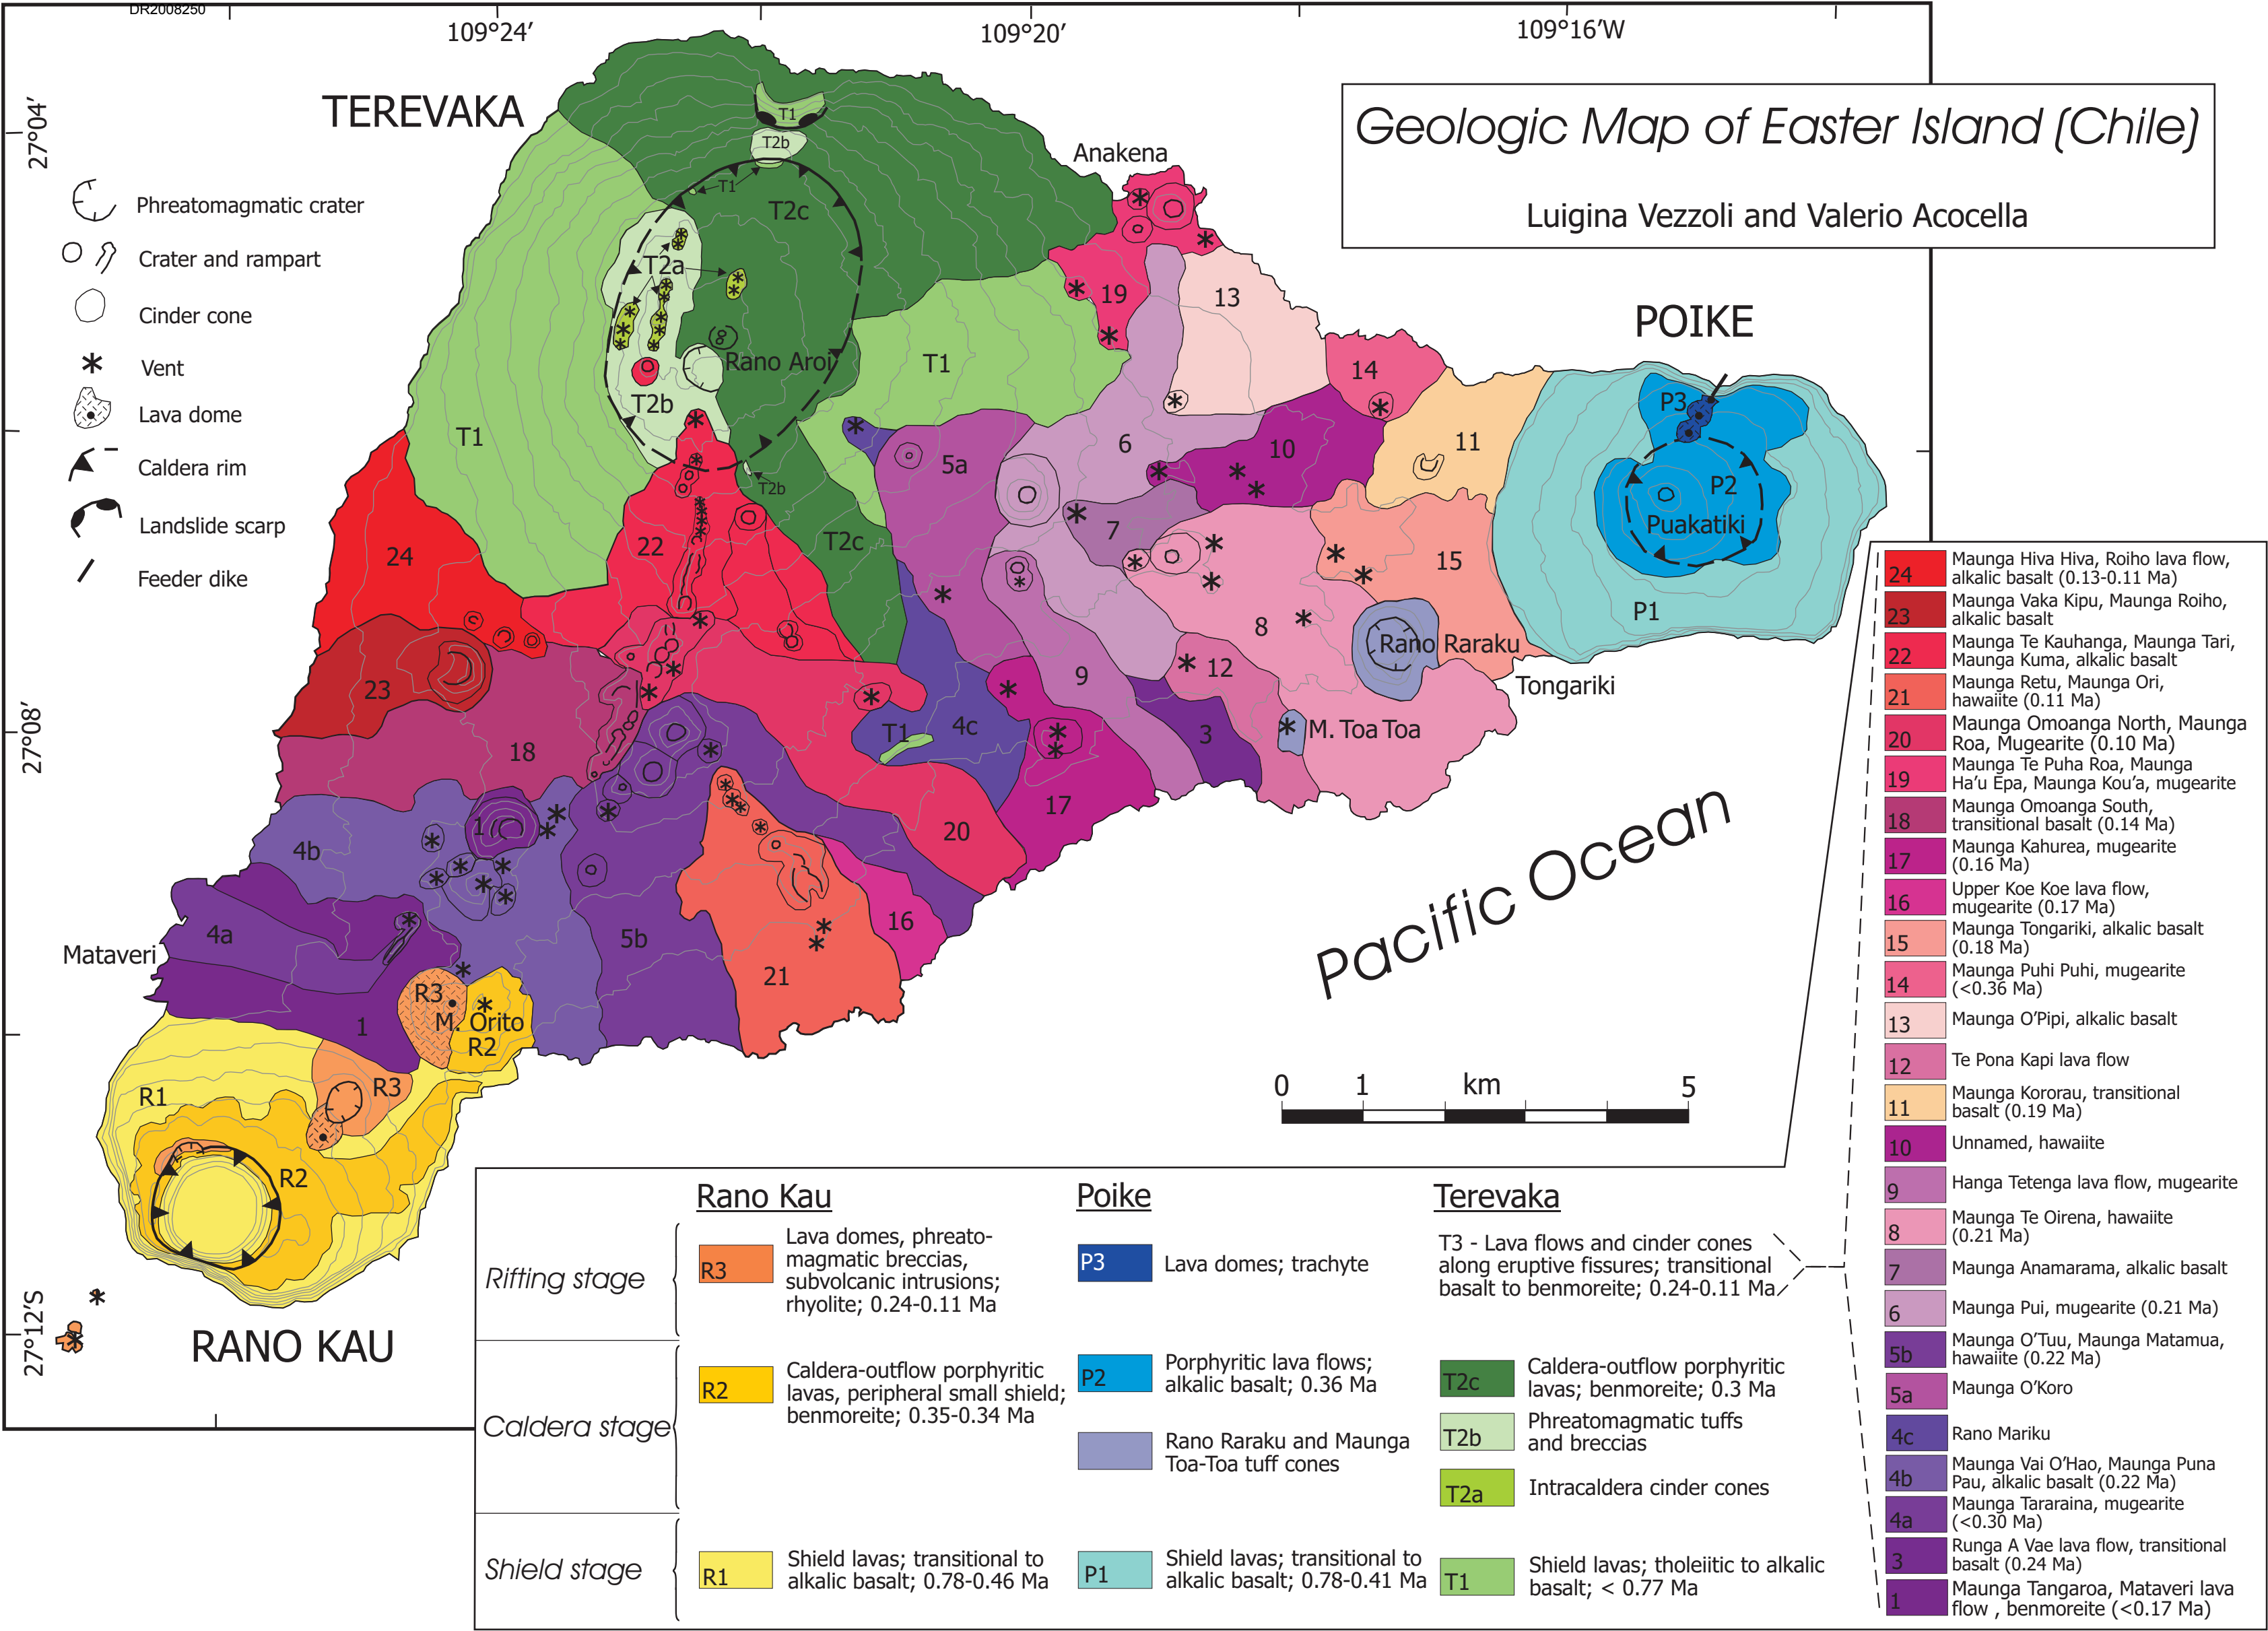

DR2008250

a)

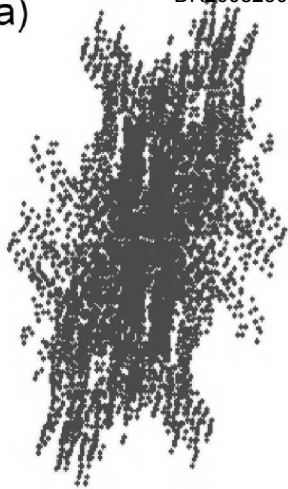

S Flank + summit  
83 data

b)

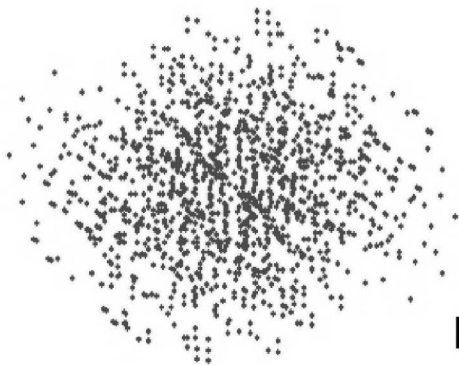

E Flank  
37 data

N

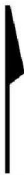

Supplement: Supplementary file 1 [file 22745339]
